# Supplementary material for: Novel dextran/graphene oxide composite material as a sorbent for solid-phase microextraction of polar aromatic compounds
Source: Royal Society of Chemistry journal article supplement (doi:10.1039/c4ra15853a), 2015-01-01

## Electronic Supplementary Information

### Novel dextran-graphene oxide composite material as a sorbent for solid-phase microextraction of polar aromatic compounds

Xiudan Hou<sup>1,2</sup>, Sheng Tang<sup>1,2</sup>, Yong Guo<sup>1</sup>, Shujuan Liu<sup>1</sup>, Jubai Li<sup>1</sup>, Licheng Wang<sup>1\*</sup>,  
Xia Liu<sup>1\*</sup>

<sup>1</sup>Key Laboratory of Chemistry of Northwestern Plant Resources and Key Laboratory for Natural Medicine of Gansu Province, Lanzhou Institute of Chemical Physics, Chinese Academy of Sciences, Lanzhou 730000, China

<sup>2</sup>University of Chinese Academy of Sciences, Chinese Academy of Sciences, Beijing 100049, China

#### 3.2 Characterization of dextran/GO-coated fiber

The unmodified fiber (Fig. S-1) was obtained by scraping the dextran/GO coating from external force. From the image, we see that the less amount of modified coating is existing, which also demonstrates the strong force of coating and fiber substrate.

**Fig. S-1** Scanning electron micrograph of a unmodified fiber.

**Fig. S-2** The IR spectrum of GO and dextran/GO

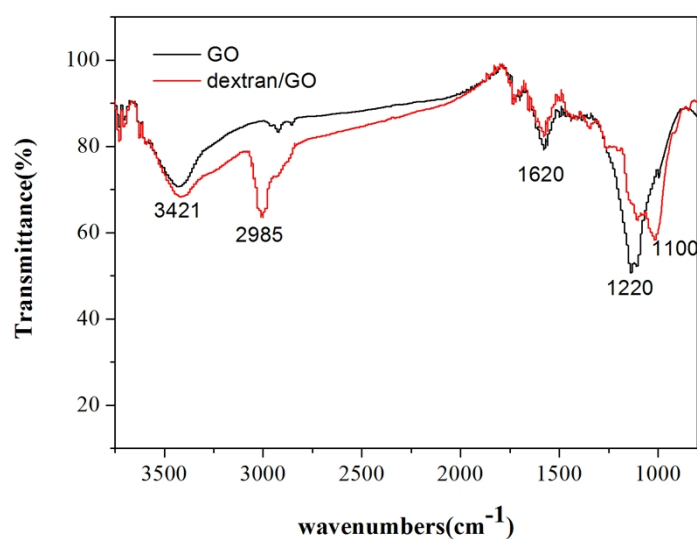

### 3.3 Stability and lifetime of the dextran/GO fiber

**Fig. S-3** Comparison of GC peak areas of analytes before and after immersing the tip of the dextran/GO-coated fiber into three different solutions for 12 h and heating treatment.

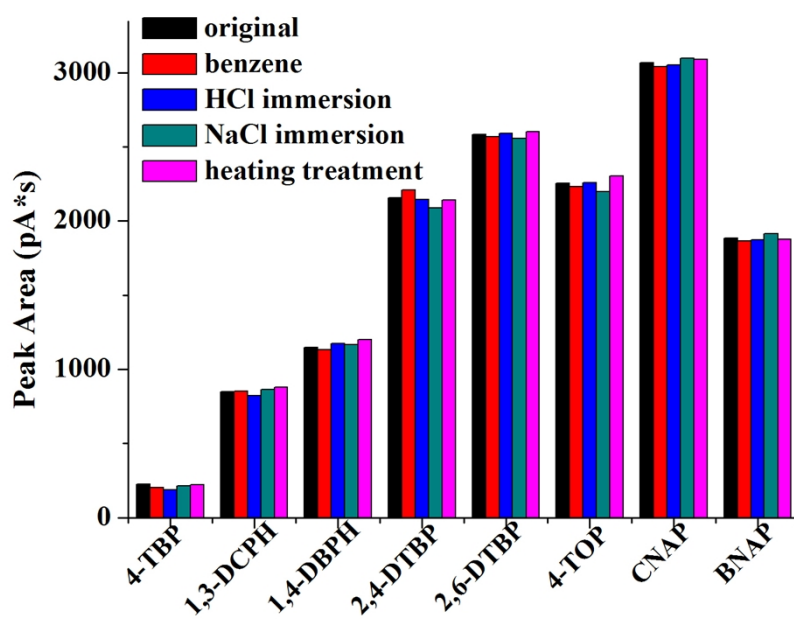

**Fig. S-4** Thermogravimetric curve of the dextran/GO composite in air gas atmosphere;

heating rate: 5 °C min<sup>-1</sup>.

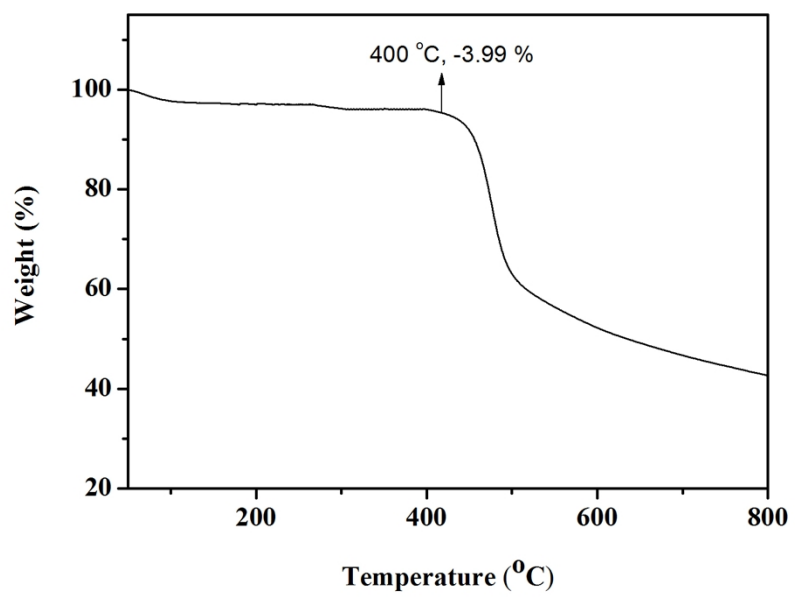

Supplement: c4ra15853a1.pdf [file c4ra15853a1.pdf]
